# Supplementary material for: Photochemical fate of quaternary ammonium compounds in river water
Source: Royal Society of Chemistry journal article supplement (doi:10.1039/d0em00086h), 2020-01-01
Supplement: d0em00086h1.pdf [file d0em00086h1.pdf]

## Electronic Supplementary Information

### *Photochemical Fate of Quaternary Ammonium Compounds in River Water*

*Priya I. Hora and William A. Arnold\**

*Department of Civil, Environmental, and Geo- Engineering, University of Minnesota – Twin Cities, 500 Pillsbury Drive SE, Minneapolis, Minnesota 55455, United States*

\*Author to whom correspondence should be addressed. Phone: 612-625-8582; Fax: 612-626-7750; email: arnol032@umn.edu

## S1 Experimental Section

### Materials and Methods

#### *Absorption spectra*

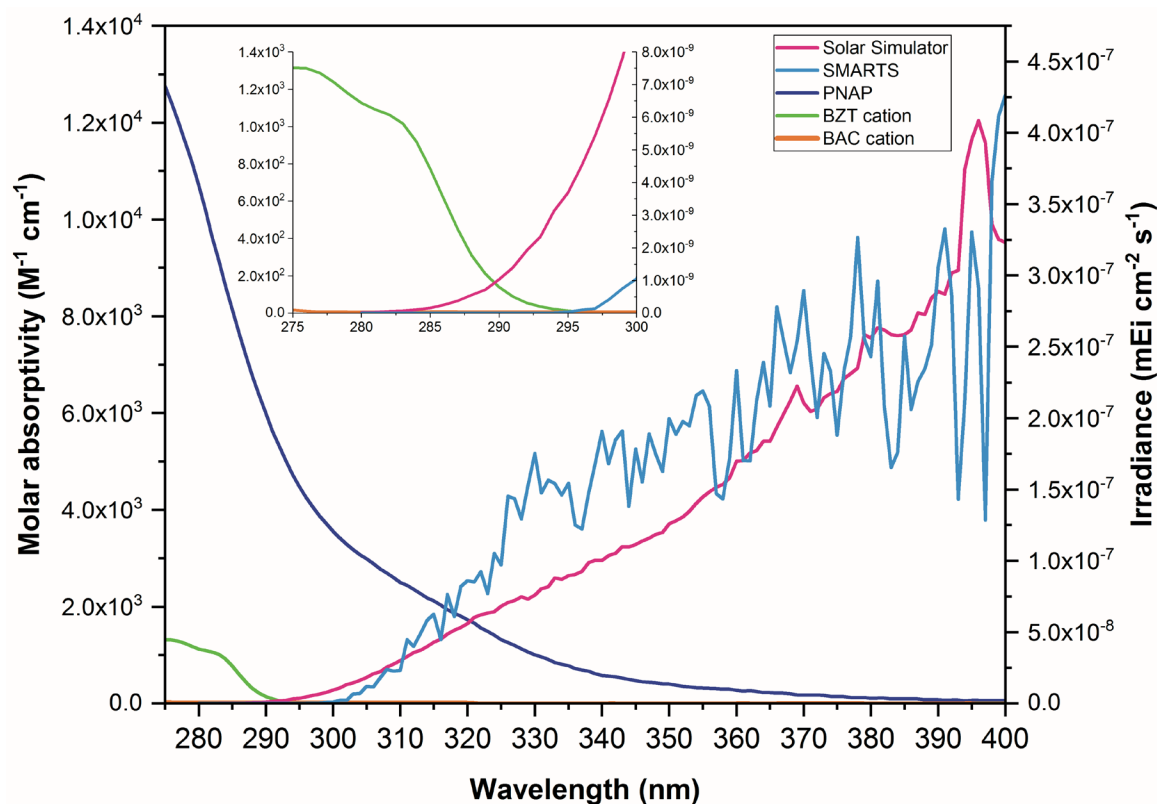

Figure S1: Solar simulator and sunlight spectral irradiances and molar absorption coefficients.

*Chemicals and reagents.*

| Table S1: QAC Structures                                 |                                                                                    |
|----------------------------------------------------------|------------------------------------------------------------------------------------|
| Benzethonium Chloride (BZT)                              | 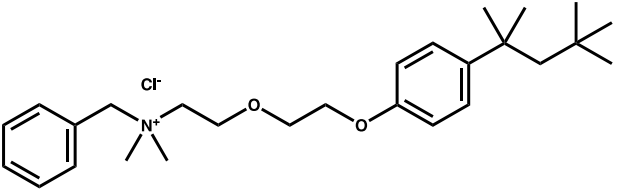 |
| C <sub>12</sub> -Benzalkonium Chloride (BAC)             |  |
| C <sub>14</sub> -BAC                                     |  |
| C <sub>12</sub> -Alkyltrimethylammonium (ATMA) Bromide   |  |
| C <sub>12</sub> -Dialkyldimethylammonium (DADMA) Bromide |  |

*River water sample collection and analysis*

| Table S2: Water quality parameters of the Mississippi river water used in photochemical study |                           |           |           |
|-----------------------------------------------------------------------------------------------|---------------------------|-----------|-----------|
| Water Quality Parameter                                                                       | Method                    | 6/5/18    | 2/27/19   |
| Nitrite (NO <sub>2</sub> <sup>-</sup> mg of N/L)                                              | Metrohm ion chromatograph | <0.1      | <0.1      |
| Nitrate (NO <sub>3</sub> <sup>-</sup> mg of N/L)                                              | Metrohm ion chromatograph | 0.7       | 0.8 ± 0.1 |
| Dissolved organic carbon (NPOC mg-C/L)                                                        | Shimadzu TOC-L analyzer   | 9.8       | 9.2       |
| Dissolved inorganic carbon (DIC mg-C/L)                                                       | Shimadzu TOC-L analyzer   | 32        | 39        |
| pH                                                                                            | Thermo Orion pH meter     | 8.5 ± 0.1 | 8.2       |

*Analytical methods*

Concentrations of BACs and BZT were measured by high-pressure liquid chromatography (HPLC) on an Agilent 1100 LC with a variable wavelength detector set at 210 nm with 50  $\mu$ L injection volume. An Eclipse XDB column (4.6  $\times$  150 mm, 3.5 or 5  $\mu$ m, Agilent) was used with isocratic mixtures of methanol and 10 mM ammonium acetate with 0.1% glacial acetic acid or formic acid and 10% methanol at a flow rate of 1 mL min<sup>-1</sup>.

**Table S3: RP-HPLC Methods**

| Compound                                               | Column <sup>a</sup>                  | Mobile Phase (v:v) <sup>b</sup>                                                                                | Injection V (μL) | Flow Rate (mLmin <sup>-1</sup> ) | Detector λ (nm) |
|--------------------------------------------------------|--------------------------------------|----------------------------------------------------------------------------------------------------------------|------------------|----------------------------------|-----------------|
| C <sub>12</sub> -BAC                                   | Eclipse XDB-C18 (4.6×150 mm, 3.5 μm) | 90% 9:1 methanol:10mM ammonium acetate with 0.1% acid<br>10% 9:1 10mM ammonium acetate with 0.1% acid:methanol | 50               | 1.0                              | 210             |
| C <sub>14</sub> -BAC                                   | Eclipse XDB-C18 (4.6×150 mm, 3.5 μm) | 95% 9:1 methanol:10mM ammonium acetate with 0.1% acid<br>5% 9:1 10mM ammonium acetate with 0.1% acid:methanol  | 50               | 1.0                              | 210             |
| BZT                                                    | Eclipse XDB-C18 (4.6×150 mm, 3.5 μm) | 90% 9:1 methanol:10mM ammonium acetate with 0.1% acid<br>10% 9:1 10mM ammonium acetate with 0.1% acid:methanol | 50               | 1.0                              | 210             |
| pCBA                                                   | Eclipse XDB-C18 (4.6×150 mm, 3.5 μm) | 45% acetonitrile<br>55% 10mM pH3 phosphate buffer with 10% acetonitrile                                        | 40               | 1.0                              | 238             |
| PNAP                                                   | Eclipse XDB-C18 (4.6×150 mm, 3.5 μm) | 65% acetonitrile<br>35% 10 mM pH 3 phosphate buffer with 10% acetonitrile                                      | 35               | 1.0                              | 220             |
| FFA                                                    | Eclipse XDB-C18 (4.6×150 mm, 3.5 μm) | 10% acetonitrile<br>90% 10mM pH3 phosphate buffer with 10% acetonitrile                                        | 35               | 1.0                              | 219             |
| <sup>a</sup> Columns were at room temperature (~20 °C) |                                      |                                                                                                                |                  |                                  |                 |
| <sup>b</sup> All mobile phases were isocratic          |                                      |                                                                                                                |                  |                                  |                 |

*Photochemical experiments: simulated and outdoor photolysis in river water*

**Table S4: Rooftop experiment dates and times**

| Date    | Time out | Time in | Cumulative Hours |
|---------|----------|---------|------------------|
| 6/28/18 | 12:04 PM | 5:00 PM | 4.9              |
| 6/29/18 | 10:09 AM | 3:40 PM | 10.5             |
| 7/2/18  | 10:00 AM | 3:50 PM | 16.3             |
| 7/5/18  | 12:00 PM | 5:00 PM | 21.3             |
| 7/6/18  | 11:30 AM | 5:00 PM | 26.8             |

**Table S5: SMARTS inputs**

| Parameter                        | Value                                             | Units                |
|----------------------------------|---------------------------------------------------|----------------------|
| Site pressure                    | Calculated from latitude and altitude             |                      |
| Latitude                         | 44.975                                            | decimal degrees (DD) |
| Altitude                         | 0.262128                                          | km                   |
| Height                           | 0                                                 |                      |
| Default atmosphere               | Mid-latitude summer                               |                      |
| Water vapor                      | Calculated from reference atmosphere and altitude |                      |
| Ozone abundance <sup>a</sup>     | 0.3125                                            | atm-cm               |
| Ozone column altitude correction | Vertical profile correction                       |                      |

|                                                                                                                                               |                                    |                  |
|-----------------------------------------------------------------------------------------------------------------------------------------------|------------------------------------|------------------|
| Gaseous absorption                                                                                                                            | Light pollution                    |                  |
| Carbon dioxide <sup>b</sup>                                                                                                                   | Mauna Loa daily or weekly averages | ppm              |
| Extraterrestrial spectrum                                                                                                                     | 1366.1                             | Wm <sup>-2</sup> |
| Aerosol model                                                                                                                                 | Shettle and Fenn rural             |                  |
| Aerosol optical depth at 500 nm                                                                                                               | 0.1                                |                  |
| Albedo                                                                                                                                        | Light soil                         |                  |
| Tilt                                                                                                                                          | 30                                 | degrees          |
| Surface azimuth                                                                                                                               | 218                                | degrees SW       |
| Solar constant                                                                                                                                | 1361                               | Wm <sup>-2</sup> |
| Longitude                                                                                                                                     | -93.233611                         | DD               |
| <sup>a</sup> Average value from Apell and McNeill (2019) <sup>1</sup> for June and September at 40° N and 50° N (converted from Dobson units) |                                    |                  |
| <sup>b</sup> <a href="https://www.esrl.noaa.gov/gmd/ccgg/trends/graph.html">https://www.esrl.noaa.gov/gmd/ccgg/trends/graph.html</a>          |                                    |                  |

## S2 Results and Discussion

### Reactivity of QACs with hydroxyl radical from hydrogen peroxide sensitizer experiments

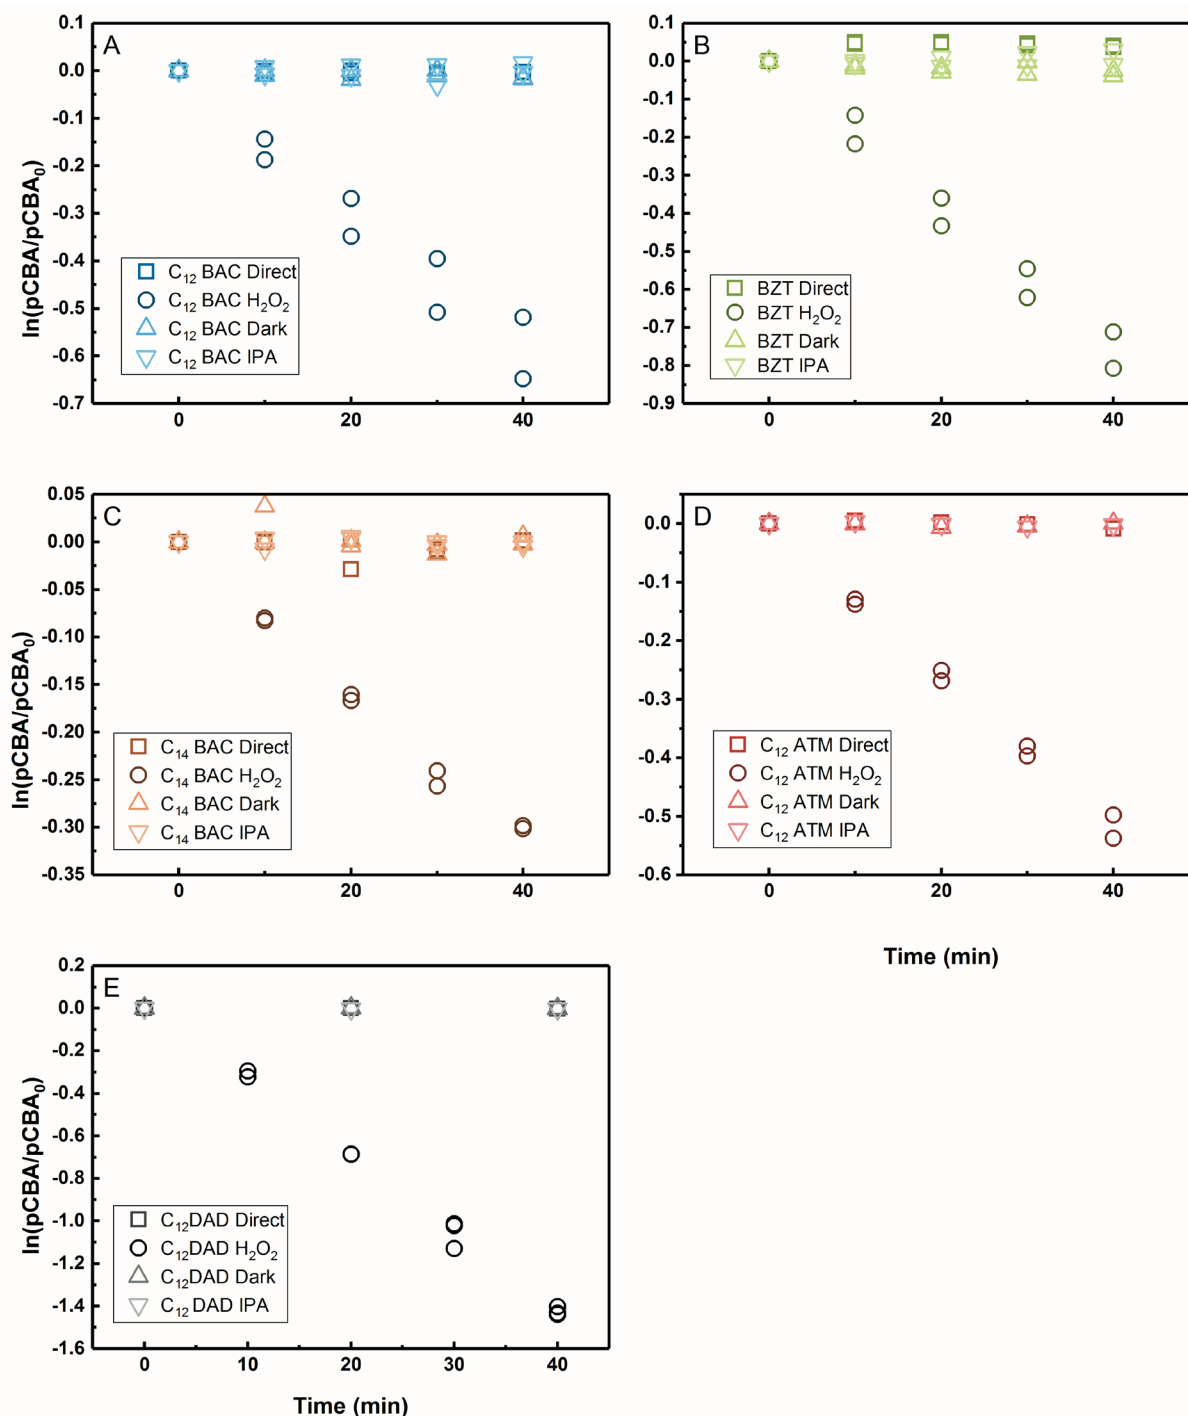

Figure S2: Log plot of pCBA concentration over time in H<sub>2</sub>O<sub>2</sub> sensitizer experiments for: A) C<sub>12</sub>-BAC, B) BZT, C) C<sub>14</sub>-BAC, D) C<sub>12</sub>-ATMA, E) C<sub>12</sub>-DADMA. Squares are direct photolysis controls, circles are hydrogen peroxide, triangles are dark controls, and upside down triangles are IPA quenched controls.

**Table S6: Steady-state hydroxyl radical concentrations in experiments with hydrogen peroxide.<sup>a</sup>**

| QAC                    | [ <sup>•</sup> OH] <sub>ss</sub> (M) |
|------------------------|--------------------------------------|
| C <sub>12</sub> -DADMA | $(1.17 \pm 0.03) \times 10^{-13}$    |
| C <sub>12</sub> -BAC   | $(5.0 \pm 0.5) \times 10^{-14}$      |
| C <sub>14</sub> -BAC   | $(2.6 \pm 0.2) \times 10^{-14}$      |
| BZT                    | $(6.4 \pm 0.2) \times 10^{-14}$      |
| C <sub>12</sub> -ATMA  | $(4.3 \pm 0.1) \times 10^{-14}$      |

<sup>a</sup>Errors represent 95% confidence intervals

*Assessing reactivity with other PPRI*s

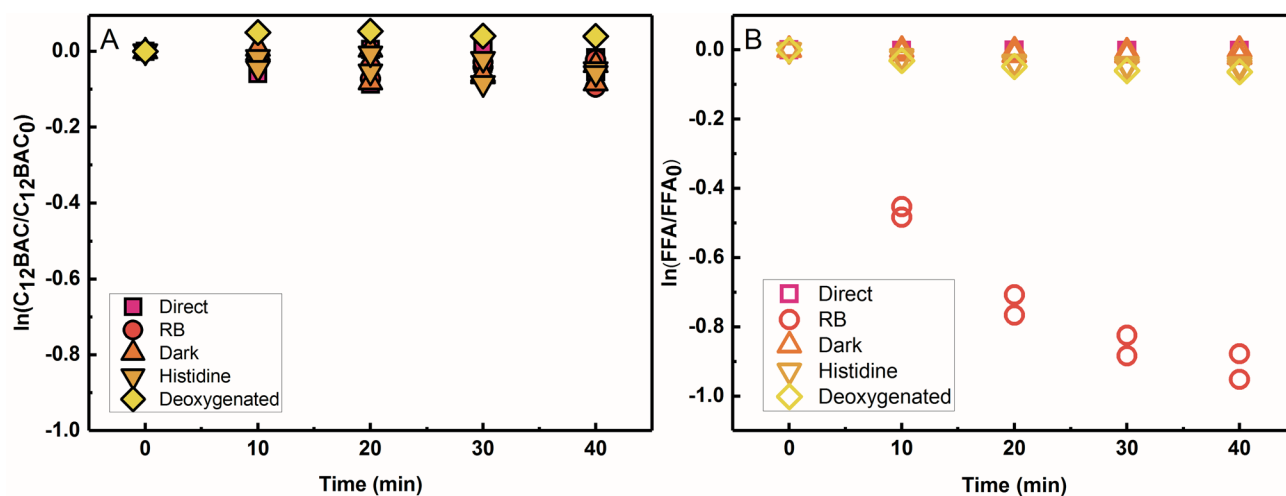

Figure S3: Log-concentration over time of: C<sub>12</sub>-BAC (A) and FFA (B) under simulated sunlight in phosphate buffer (Direct, pink squares), with rose bengal (RB, red circles), dark control (orange triangle), histidine quenched control (light orange upside down triangle), deoxygenated control (yellow diamond).

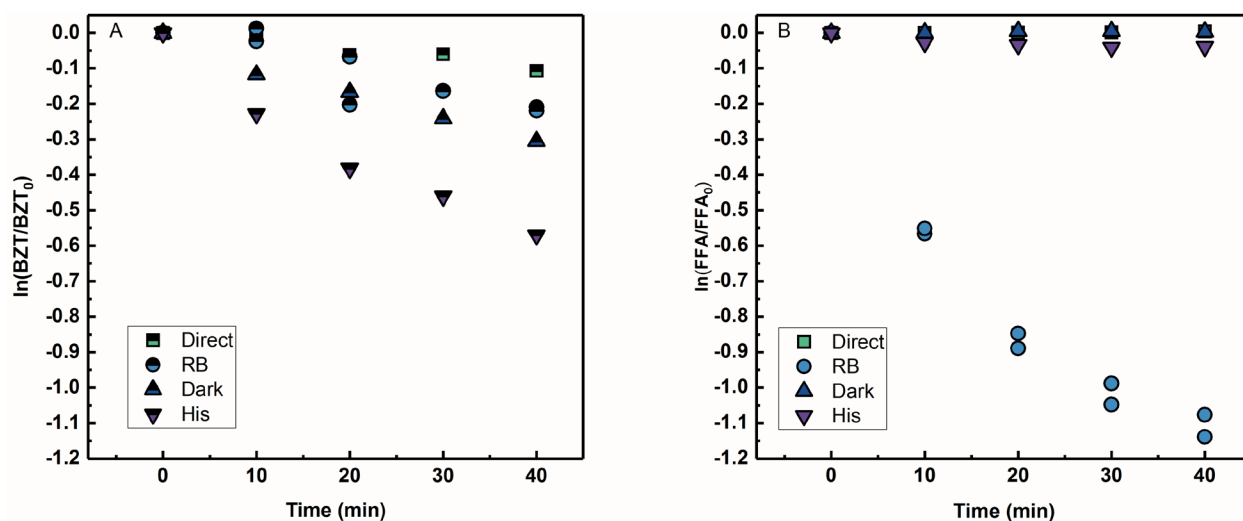

Figure S4: Log-concentrations over time of: BZT (A) and furfuryl alcohol (B) under simulated sunlight in phosphate buffer (Direct, green squares), with rose bengal (RB, light blue circles),

dark control (Dark, dark blue triangle), histidine quenched control (His, purple upside down triangle).

Additional experiments in which 10  $\mu\text{M}$  BZT was spiked into 6 mL buffer and then BZT and 2  $\mu\text{M}$  of RB were spiked into 6 mL buffer and 6 mL river water and wrapped in foil and kept on the bench top under ambient conditions. These tests showed 2% decrease in BZT concentration over 5 days alone in buffer, 20% decrease in buffer with rose bengal, and 18% decrease in river water with rose bengal.

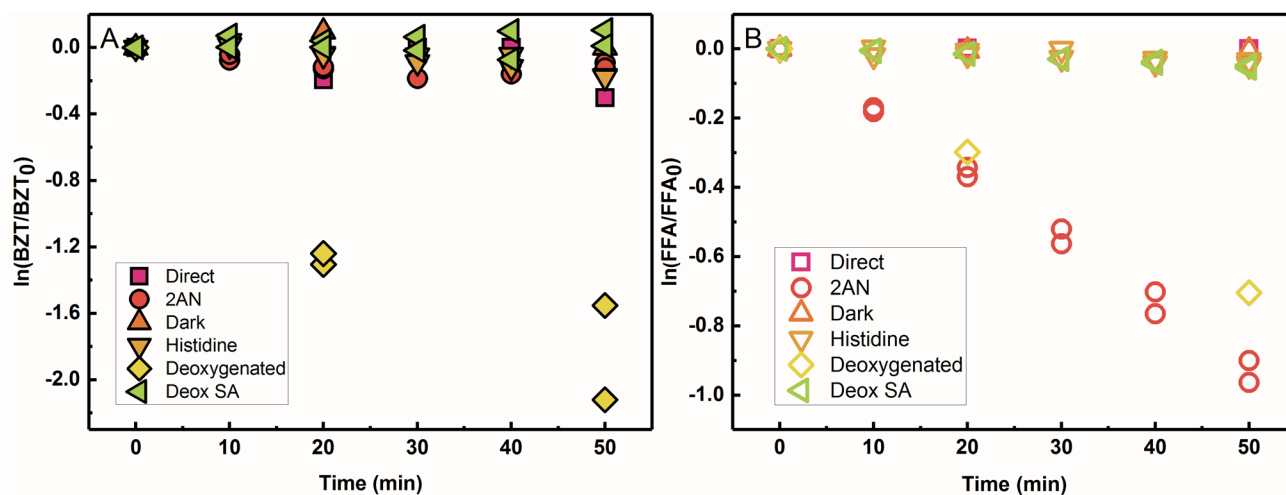

Figure S5: Log-concentration over time of: BZT (A) and FFA (B) under simulated sunlight in phosphate buffer (Direct, pink squares), with 2-acetylnaphthalene (2AN, red circles), dark control (orange triangle), histidine quenched control (light orange upside down triangle), deoxygenated control (yellow diamond), and sorbic acid quenched deoxygenated control (green left triangle).

**Table S7: Pseudo-first-order rate constants,  $k_{\text{obs}}$  ( $\text{s}^{-1}$ ), for FFA irradiated under simulated sunlight in singlet oxygen sensitizer experiments and singlet oxygen steady-state concentrations,  $[^1\text{O}_2]_{\text{ss}}$  (M)<sup>a</sup>**

|                               | FFA with BZT                     |                                   | FFA with C <sub>12</sub> -BAC  |                                 |
|-------------------------------|----------------------------------|-----------------------------------|--------------------------------|---------------------------------|
| Sample                        | $k_{\text{obs}}$                 | $[^1\text{O}_2]_{\text{ss}}$      | $k_{\text{obs}}$               | $[^1\text{O}_2]_{\text{ss}}$    |
| Direct                        | N/A                              | N/A                               | $(1.2 \pm 0.5) \times 10^{-6}$ | $(10 \pm 4) \times 10^{-15}$    |
| 2-acetylnaphthalene           | $(3.06 \pm 0.08) \times 10^{-4}$ | $(2.62 \pm 0.05) \times 10^{-12}$ | N/A                            | N/A                             |
| Rose Bengal                   | N/A                              | N/A                               | $(4.5 \pm 0.8) \times 10^{-4}$ | $(3.9 \pm 1.2) \times 10^{-12}$ |
| Dark                          | $(0.2 \pm 0.3) \times 10^{-6}$   | $(2 \pm 2) \times 10^{-14}$       | $(5 \pm 3) \times 10^{-6}$     | $(4 \pm 3) \times 10^{-14}$     |
| Histidine                     | $(1.2 \pm 0.3) \times 10^{-5}$   | $(1.1 \pm 0.3) \times 10^{-13}$   | $(2.3 \pm 0.3) \times 10^{-5}$ | $(2.0 \pm 0.3) \times 10^{-13}$ |
| Deoxygenated                  | $(2.4 \pm 0.1) \times 10^{-4}$   | $(2.03 \pm 0.05) \times 10^{-12}$ | $(3.1 \pm 0.8) \times 10^{-5}$ | $(2.7 \pm 0.7) \times 10^{-13}$ |
| Deoxygenated with sorbic acid | $(1.6 \pm 0.1) \times 10^{-5}$   | $(1.4 \pm 0.1) \times 10^{-13}$   | N/A                            | N/A                             |

<sup>a</sup>Error bars represent 95% confidence intervals

*Photochemical transformation of BACs & BZT in river water under simulated and natural sunlight*

**Table S8: Pseudo-first-order rate constants,  $k_{\text{obs}}$  ( $\text{h}^{-1}$ )<sup>a</sup>, for QACs irradiated under simulated sunlight**

|                     | BZT                            | C <sub>12</sub> -BAC           | C <sub>14</sub> -BAC           |
|---------------------|--------------------------------|--------------------------------|--------------------------------|
| MRW                 | $(9.7 \pm 0.3) \times 10^{-2}$ | $(2.9 \pm 0.4) \times 10^{-2}$ | $(2.8 \pm 0.6) \times 10^{-2}$ |
| MRW <sub>corr</sub> | $(2.0 \pm 0.3) \times 10^{-2}$ | -                              | -                              |
| Direct              | $(7.2 \pm 0.7) \times 10^{-2}$ | $(2 \pm 1) \times 10^{-3}$     | $(-6 \pm 3) \times 10^{-3}$    |
| IPA                 | $(7.7 \pm 0.4) \times 10^{-2}$ | $(1.7 \pm 0.3) \times 10^{-3}$ | $(5 \pm 3) \times 10^{-3}$     |
| Dark                | $(6 \pm 2) \times 10^{-2}$     | $(-2 \pm 3) \times 10^{-3}$    | $(3 \pm 3) \times 10^{-3}$     |

<sup>a</sup>Error bars represent 95% confidence intervals



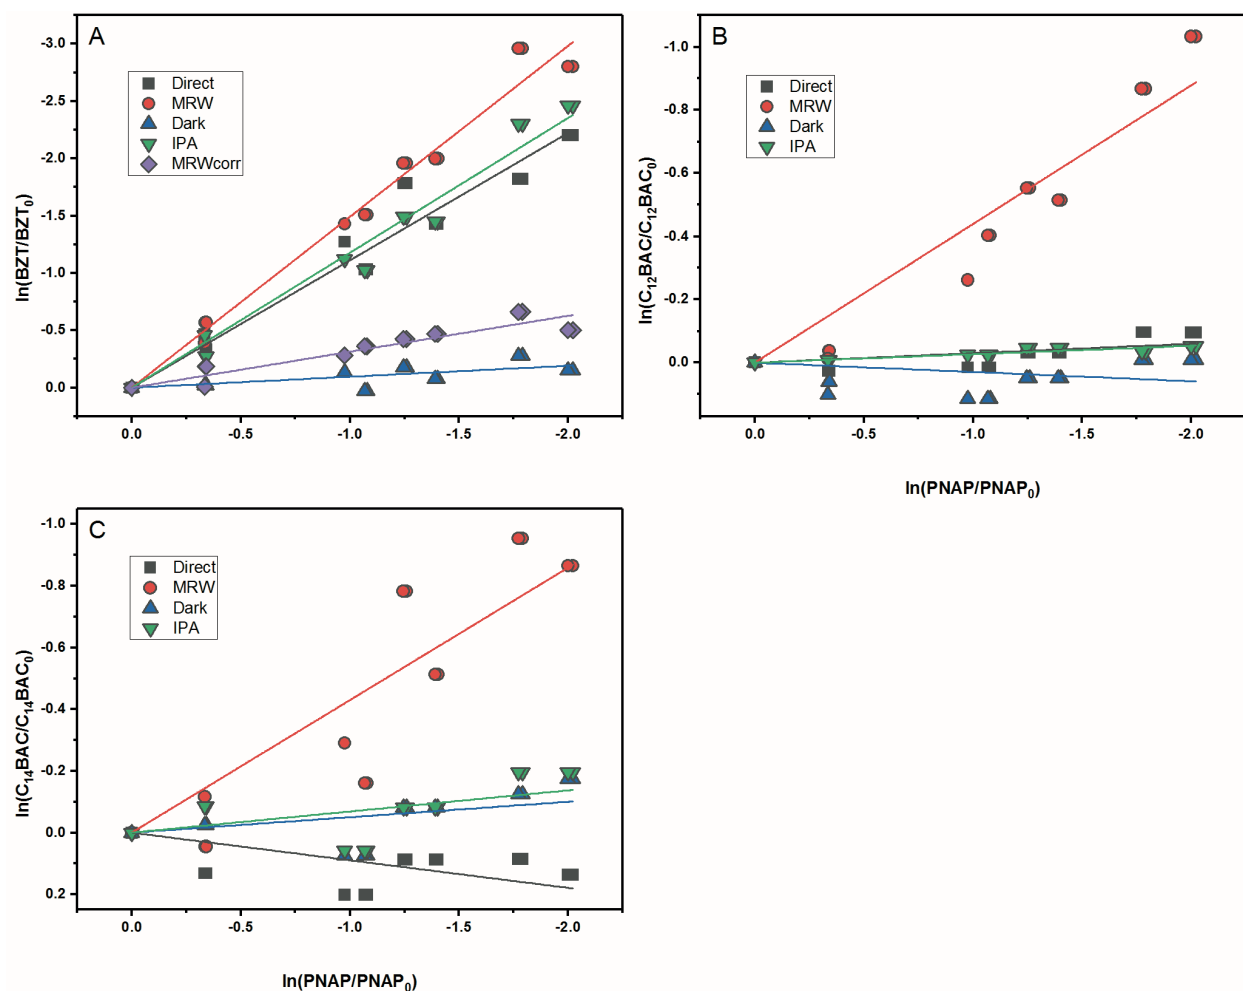

Figure S6: Logarithmic plots of BZT (A), C<sub>12</sub>-BAC (B), and C<sub>14</sub>-BAC (C) solar simulator photolysis versus actinometer loss in phosphate buffer (Direct, black squares), Mississippi River water (MRW, red circles), MRW dark controls (Dark, blue diamonds), and MRW with 1% isopropanol (IPA, green upside down triangles). Purple diamonds are MRW time points corrected for direct photolysis to show BZT indirect photochemical loss in MRW (MRW<sub>corr</sub>). Solid lines represent linear regressions.

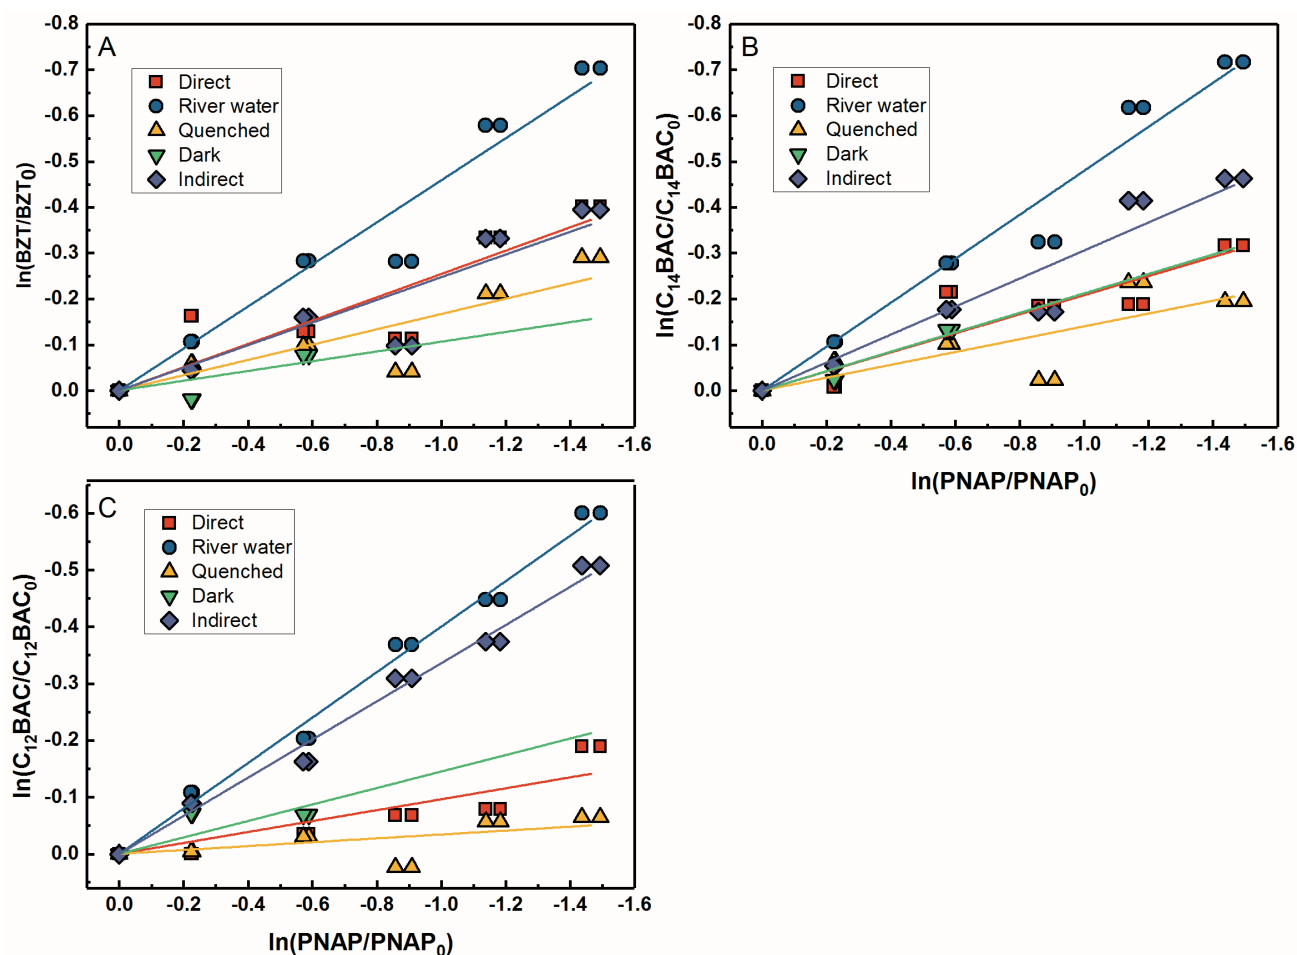

Figure S7: Logarithmic plots of BZT (A),  $\text{C}_{14}$ -BAC (B), and  $\text{C}_{12}$ -BAC (C) natural sunlight photodegradation versus actinometer loss in phosphate buffer (Direct, red squares), Mississippi River water (River water, blue circles), river water with 1% isopropanol (Quenched, yellow triangles), river water dark controls (Dark, green upside down triangles), total photochemical loss in river water minus other abiotic losses (Indirect, purple diamonds). Solid lines represent linear regressions.

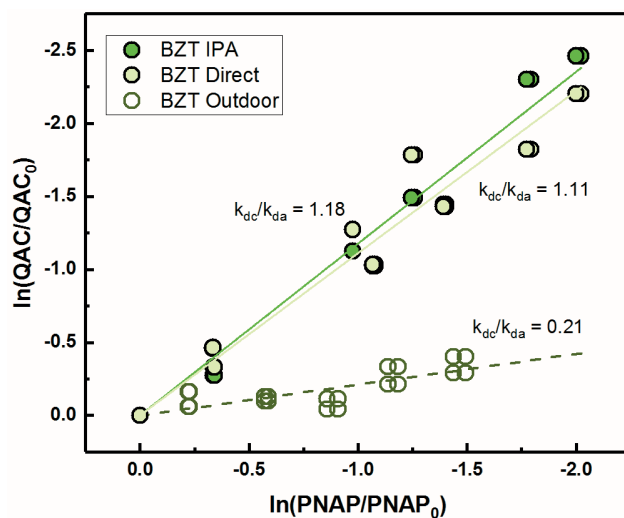

Figure S8: Log-log plot of BZT versus PNAP for solar simulator (solid symbols) and natural sunlight (open symbols) quantum yield determinations in river water. Solid and dashed lines represent linear regressions for solar simulator and natural sunlight experiments, respectively.

### S3 Additional tables and figures

*Photochemical transformation of BACs & BZT in river water under simulated and natural sunlight*

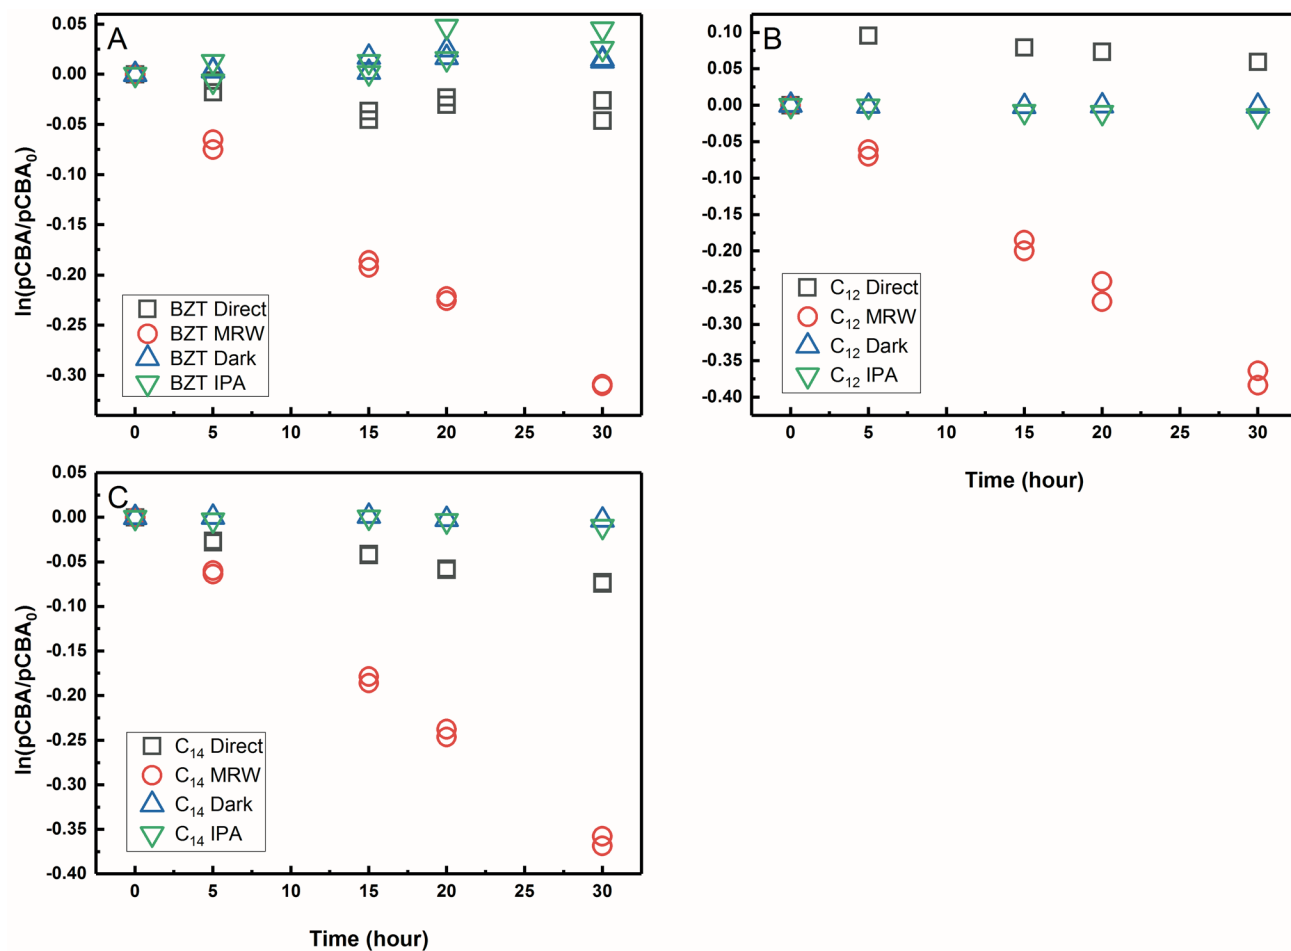

Figure S9: Logarithmic plot of pCBA loss over time in river water solar simulator experiments for: A) BZT, B) C<sub>12</sub>-BAC, and C) C<sub>14</sub>-BAC. Black squares are direct photolysis controls, red circles are river water samples, blue triangles are dark controls, and green triangles are IPA quenched controls.

*Half-life estimate*

$$k_c = 2.303\Phi_c \sum_{\lambda}(\epsilon_{\lambda,c}I_{\lambda}) \quad (1)$$

$$t_{1/2} = \frac{\ln(2)}{k_c} \quad (2)$$

## Literature Cited

1. Apell, J. N. & McNeill, K. Updated and validated solar irradiance reference spectra for estimating environmental photodegradation rates. *Environ. Sci. Process. Impacts* **21**, 427–437 (2019).
